1 **Full title:** Clinical and laboratory features of COVID-19 illness and outcomes in  
2 immunocompromised individuals during the first pandemic wave in Sydney, Australia  
3  
4 **Short title:** COVID-19 illness and outcomes in immunocompromised individuals in Sydney,  
5 Australia  
6  
7 Nila J. Dharan<sup>1\*</sup>, Sarah C. Sasson<sup>1,2,3\*</sup>, Golo Ahlenstiel<sup>4,5</sup>, Christopher R. Andersen<sup>6,7</sup>, Mark  
8 Bloch<sup>1,8</sup>, Griselda Buckland<sup>1</sup>, Nada Hamad<sup>9,10,11</sup>, Win Min Han<sup>1</sup>, Anthony D. Kelleher<sup>1,9</sup>,  
9 Georgina V. Long<sup>6,12,13</sup>, Gail V. Matthews<sup>1,9</sup>, Michael M. Mina<sup>14</sup>, Emmanuelle Papot<sup>1</sup>, Kathy  
10 Petoumenos<sup>1</sup>, Sanjay Swaminathan<sup>3,4,5</sup>, Barbara Withers<sup>9</sup>, James Yun<sup>11,15</sup> and Mark N.  
11 Polizzotto<sup>1,9,16</sup>, on behalf of the CORIA Study Group#  
12  
13 <sup>1</sup>Kirby Institute, UNSW Sydney, Sydney, New South Wales, Australia  
14 <sup>2</sup>NSW Health Pathology, New South Wales, Australia  
15 <sup>3</sup>Westmead Hospital, Westmead, New South Wales, Australia  
16 <sup>4</sup>Blacktown Hospital, Blacktown, New South Wales, Australia  
17 <sup>5</sup>Western Sydney University, Penrith, New South Wales, Australia  
18 <sup>6</sup>Royal North Shore Hospital, St Leonards, New South Wales, Australia  
19 <sup>7</sup>The George Institute for Global Health, Newtown, New South Wales, Australia  
20 <sup>8</sup>Holdsworth House Medical Practice, Darlinghurst, New South Wales, Australia  
21 <sup>9</sup>St Vincent's Hospital, Darlinghurst, New South Wales, Australia  
22 <sup>10</sup>School of Clinical Medicine, Faculty of Medicine and Health, University of New South  
23 Wales Sydney, Sydney, New South Wales, Australia  
24 <sup>11</sup>School of Medicine, Sydney, University of Notre Dame, Chippendale, New South Wales,  
25 Australia

26 <sup>12</sup>Melanoma Institute Australia, Wollstonecraft, New South Wales, Australia

27 <sup>13</sup>The Faculty of Medicine and Health, The University of Sydney, Sydney, New South Wales,

28 Australia

29 <sup>14</sup>Northern Beaches Hospital, Frenchs Forest, New South Wales, Australia

30 <sup>15</sup>Nepean Hospital, Kingswood, New South Wales, Australia

31 <sup>16</sup>Australian National University, Canberra, Australian Capital Territory, Australia

32

33 \*NJD and SCS contributed equally

34 #CORIA Study Group: see Acknowledgements

35

36 **Corresponding authors:**

37 Dr Nila J. Dharan

38 Kirby Institute

39 Level 6, Wallace Wurth Building

40 UNSW SYDNEY 2052

41 E: [ndharan@kirby.unsw.edu.au](mailto:ndharan@kirby.unsw.edu.au)

42 T: 02 9385 0967

43

44 Dr Sarah C. Sasson

45 Kirby Institute

46 Level 6, Wallace Wurth Building

47 UNSW SYDNEY 2052

48 E: [ssasson@kirby.unsw.edu.au](mailto:ssasson@kirby.unsw.edu.au)

49 T: 02 9385 0967

50

51 **Keywords:** SARS-CoV-2; COVID-19; Immunocompromised

52 **Abstract:**

53 People with immunocompromising conditions are at increased risk of SARS-CoV-2 infection  
54 and mortality, however early in the pandemic it was challenging to collate data on this  
55 heterogenous population. We conducted a registry study of immunocompromised individuals  
56 with polymerase chain reaction (PCR)-confirmed SARS-CoV-2 infection from March –  
57 October 2020 in Sydney, Australia to understand clinical and laboratory outcomes in this  
58 population prior to the emergence of the Delta variant. 27 participants were enrolled into the  
59 study including people with a haematologic oncologic conditions (n=12), secondary  
60 immunosuppression (N=8) and those with primary or acquired immunodeficiency (i.e. HIV;  
61 N=7). All participants had symptomatic COVID-19 with the most common features being  
62 cough (64%), fever (52%) and headache (40%). Five patients demonstrated delayed SARS-  
63 CoV-2 clearance lasting three weeks to three months. The mortality rate in this study was  
64 7% compared to 1.3% in the state of New South Wales Australia during the same period.  
65 This study provides data from the first eight months of the pandemic on COVID-19 outcomes  
66 in at-risk patient groups.

67 **Introduction:**

68 Early in the COVID-19 pandemic, male sex, advanced age and certain comorbidities were  
69 identified as risk factors for death following SARS-CoV-2 infection [1-4]. Large international  
70 studies with data on immunocompromising conditions identified that patients with  
71 haematological malignancies, connective tissue disease, solid organ transplantation and those  
72 on immunosuppressive therapies for other indications were also at increased risk of death [4].  
73 A study of 310 immunocompromised individuals with SARS-CoV-2 infection in the United  
74 Kingdom reported that, compared with the general population, mortality among hospitalised  
75 immunocompromised individuals was greater (38% vs. 26%) and immunocompromised  
76 individuals were younger at time of death [5]. In Australia, chronic immunosuppression was  
77 also identified to be associated with increased risk of death in patients in intensive care units  
78 early in the pandemic [6].

79

80 The Coronavirus Outcomes Registries in Immunocompromised Individuals Australia  
81 (CORIA) was a clinical registry study of adults with immunocompromising conditions and  
82 SARS-CoV-2 infection acquired between March – October 2020, prior to COVID-19  
83 vaccines, specific therapies and the emergence of variants of concern (VOCs). The aim of  
84 this study was to determine the clinical and laboratory COVID-19 outcomes of adult patients  
85 with immunocompromising conditions.

86

87 **Methods:**

88 The study included individuals with specified immunocompromising conditions aged 18  
89 years or older with polymerase chain reaction (PCR)-confirmed SARS-CoV-2 infection  
90 between March 1, 2020 – October 31, 2020. Participants had been tested after developing  
91 symptoms consistent with COVID-19 and/or being identified as a close contact of a

92 confirmed case. Participants were enrolled from nine clinical sites in Sydney, Australia:  
93 seven major teaching hospitals with high caseloads of immunocompromised individuals; one  
94 primary care centre with a high caseload of people with HIV; and one specialist melanoma  
95 centre. Eligible immunocompromising conditions included: primary immunodeficiency,  
96 defined as a predisposition to infection associated with a genetic or inherited deficit of  
97 immune function; current receipt of immunosuppressive therapy (excluding inhaled  
98 corticosteroids); HIV infection; undergoing active management for cancer diagnosed within  
99 36 months of enrolment (excluding superficial basal cell and squamous cell carcinomas;  
100 including treatment with immune checkpoint inhibitors); and solid organ transplantation. All  
101 eligible cases from the nine enrolling sites were included.

102

103 All data were sourced from the participants' medical record. At enrolment, the following data  
104 were collected: demographic and clinical characteristics; epidemiologic risk factors for  
105 infection; medical history; presenting clinical symptoms; clinical status; COVID-19  
106 treatments; and clinical test results including SARS-CoV-2 and respiratory pathogen PCR  
107 testing, haematology, hepatic and renal chemistry, and inflammatory biomarkers. Follow-up  
108 data on clinical symptoms, clinical status, laboratory results and treatment history were  
109 collected on Days 3, 7, 14, 21, 28 and 3 months.

110

111 Three main groups of immunocompromising conditions were categorised as: 1) haematologic  
112 and oncologic conditions; 2) primary or acquired immunodeficiency (i.e. HIV); and 3)  
113 secondary immunosuppression (including immunosuppressive therapy and solid organ  
114 transplantation). The time to end of clinical isolation was defined as the time from initial  
115 SARS-CoV-2 positive PCR to either a negative SARS-CoV-2 PCR or resolution of all  
116 symptoms after a certain timepoint according to local guidance at the time [7]. Descriptive

117 statistics were used to calculate the proportions of participants with various clinical and  
118 laboratory characteristics at presentation and follow up, overall and across  
119 immunocompromising conditions group.

120

121 The study was reviewed by the St Vincent's Hospital Human Research Ethics Committee and  
122 granted a waiver of the need for individual consent for data collection as per the National  
123 Statement on Ethical Conduct in Human Research. The study was registered at  
124 Clinicaltrials.gov (NCT04354818).

125

126 **Results:**

127 Of the 27 participants enrolled, 58% were male and the median age was 66 years. Twelve  
128 (44%) of the participants had haematologic (n=7) or oncologic conditions (n=5), 8 (30%) had  
129 secondary immunosuppression and 7 (26%) had primary or acquired immunodeficiency (i.e.  
130 HIV), as shown in Table 1 (further detail in Supplemental Table 1). Of the total cohort with  
131 available data, 41% had a history of hypertension, 26% had diabetes and 19% had  
132 cardiovascular disease. Among the 25 participants with clinical symptom data, all had  
133 symptomatic disease with the most common presenting symptoms being cough (64%), fever  
134 (52%) and headache (40%) (Table 1). Two patients, both in the haematology/oncology group,  
135 received treatments for COVID-19 as part of clinical trials (remdesivir n=1;  
136 hydroxychloroquine n=1).

137 **Table 1.** Demographic characteristics, medical history, clinical symptoms and laboratory results at time of presentation, by primary  
 138 immunocompromising diagnostic category

| Baseline characteristics | Primary diagnostic category                                     |                                                          |                                                                    | Total<br>N=27 |
|--------------------------|-----------------------------------------------------------------|----------------------------------------------------------|--------------------------------------------------------------------|---------------|
|                          | Haematologic/oncologic conditions <sup>1</sup><br>N=12<br>n (%) | Secondary immunosuppression <sup>2</sup><br>N=8<br>n (%) | Primary and acquired immunodeficiency <sup>3</sup><br>N=7<br>n (%) |               |
| <b>Demographics</b>      |                                                                 |                                                          |                                                                    |               |
| Age, median (range)      | 74 (62-75)                                                      | 63 (42-75)                                               | 55 (39-55)                                                         | 66 (54-74)    |
| <b>Gender</b>            |                                                                 |                                                          |                                                                    |               |
| Female                   | 5 (42%)                                                         | 4 (50%)                                                  | 2 (29%)                                                            | 11 (41%)      |
| Male                     | 7 (58%)                                                         | 4 (50%)                                                  | 5 (71%)                                                            | 16 (58%)      |
| <b>Ethnicity</b>         |                                                                 |                                                          |                                                                    |               |
| Caucasian                | 9 (75%)                                                         | 6 (75%)                                                  | 7 (100%)                                                           | 22 (81%)      |
| Asian                    | 0 (0%)                                                          | 1 (13%)                                                  | 0 (0%)                                                             | 1 (4%)        |
| Other                    | 3 (25%)                                                         | 1 (13%)                                                  | 0 (0%)                                                             | 4 (15%)       |



|                                        |            |            |            |            |
|----------------------------------------|------------|------------|------------|------------|
| <b>BMI, available data</b>             | 9 (75%)    | 6 (75%)    | 5 (71%)    | 20 (74%)   |
| Median (range)                         | 28 (25-32) | 32 (31-35) | 36 (28-36) | 31 (25-35) |
| <b>BMI group</b>                       |            |            |            |            |
| <30                                    | 6 (50%)    | 1 (13%)    | 2 (29%)    | 9 (33%)    |
| ≥30                                    | 3 (25%)    | 5 (63%)    | 3 (43%)    | 11 (41%)   |
| Missing                                | 3 (25%)    | 2 (25%)    | 2 (29%)    | 7 (26%)    |
| <b>Medical History</b>                 |            |            |            |            |
| <b>Smoking status</b>                  |            |            |            |            |
| Never                                  | 7 (58%)    | 6 (75%)    | 3 (43%)    | 16 (59%)   |
| Past (>12 months)                      | 3 (25%)    | 1 (13%)    | 1 (14%)    | 5 (19%)    |
| Recent (within 12 months, but not now) | 0 (0%)     | 0 (0%)     | 1 (14%)    | 1 (4%)     |
| Current                                | 0 (0%)     | 0 (0%)     | 1 (14%)    | 1 (4%)     |
| Unknown                                | 2 (17%)    | 1 (13%)    | 1 (14%)    | 4 (15%)    |
| <b>Chronic disease</b>                 |            |            |            |            |

| <b>history</b>                           |           |          |          |           |
|------------------------------------------|-----------|----------|----------|-----------|
| Diabetes mellitus <sup>4</sup>           | 3 (25%)   | 2 (25%)  | 2 (29%)  | 7 (26%)   |
| Unknown                                  | 2 (17%)   | 1 (13%)  | 0 (0%)   | 3 (11%)   |
| Hypertension                             | 3 (25%)   | 4 (50%)  | 4 (57%)  | 11 (41%)  |
| Unknown                                  | 2 (17%)   | 1 (13%)  | 0 (0%)   | 3 (11%)   |
| Cardiovascular disease <sup>5</sup>      | 4 (33%)   | 1 (13%)  | 0 (0%)   | 5 (19%)   |
| Unknown                                  | 2 (17%)   | 1 (13%)  | 0 (0%)   | 3 (11%)   |
| Respiratory disease <sup>6</sup>         | 3 (25%)   | 1 (13%)  | 5 (71%)  | 9 (33%)   |
| Unknown                                  | 2 (17%)   | 1 (13%)  | 0 (0%)   | 3 (11%)   |
| <b>Presenting clinical symptoms</b>      |           |          |          |           |
| Available data, n (%)                    | 11 (92%)  | 7 (88%)  | 7 (100%) | 25 (93%)  |
| Any symptoms                             | 11 (100%) | 7 (100%) | 7 (100%) | 25 (100%) |
| Any symptoms (fever, cough, headache and | 10 (91%)  | 6 (86%)  | 7 (100%) | 23 (92%)  |

|                                                          |           |         |         |           |
|----------------------------------------------------------|-----------|---------|---------|-----------|
| shortness of breath)                                     |           |         |         |           |
| Fever                                                    | 7 (64%)   | 3 (43%) | 3 (43%) | 13 (52%)  |
| Cough                                                    | 8 (73%)   | 5 (72%) | 3 (43%) | 16 (64%)  |
| Sore throat                                              | 1 (9%)    | 3 (43%) | 4 (57%) | 8 (32%)   |
| Myalgia                                                  | 1 (9%)    | 4 (57%) | 0 (0%)  | 5 (20%)   |
| Rhinorrhoea                                              | 2 (18%)   | 2 (29%) | 0 (0%)  | 4 (16%)   |
| Fatigue                                                  | 1 (9%)    | 3 (43%) | 1 (14%) | 5 (20%)   |
| Shortness of breath                                      | 0 (0%)    | 2 (29%) | 3 (43%) | 5 (20%)   |
| Headache                                                 | 2 (18%)   | 4 (57%) | 4 (57%) | 10 (40%)  |
| Diarrhoea                                                | 3 (27%)   | 1 (14%) | 2 (29%) | 6 (24%)   |
| Alteration of sense of<br>smell                          | 0 (0%)    | 1 (14%) | 0 (0%)  | 1 (4%)    |
| Alteration of sense of<br>taste                          | 0 (0%)    | 1 (14%) | 0 (0%)  | 1 (4%)    |
| Oxygen saturation (pulse<br>oximetry), median<br>(range) | 93% (n=1) | N/A     | N/A     | 93% (n=1) |

|                                    |                |                |                 |                |
|------------------------------------|----------------|----------------|-----------------|----------------|
| Requiring supplemental             | 1 (9%)         | 0 (0%)         | 0 (0%)          | 1 (4%)         |
| O2                                 |                |                |                 |                |
| <b>Vital signs, median (range)</b> |                |                |                 |                |
| Available data, n (%)              | 5 (42%)        | 3 (38%)        | 5 (71%)         | 13 (48%)       |
| Pulse                              | 97 (79-108)    | 85 (85-85)     | 118 (81-122)    | 85 (81-108)    |
| Systolic Blood Pressure            | 125 (117-147)  | 141 (128-170)  | 128 (121-161)   | 128 (121-150)  |
| Diastolic Blood Pressure           | 79 (79-81)     | 73 (63-104)    | 86 (81-90)      | 81 (73-90)     |
| <b>Haematology</b>                 |                |                |                 |                |
| Available data, n (%)              | 3 (25%)        | 3 (38%)        | 3 (43%)         | 9 (33%)        |
| White blood cell count             | 5.4 (3.0-10.1) | 4.4 (3.8-10.9) | 10.8 (6.8-10.8) | 6.8 (4.4-10.8) |
| %Neutrophils                       | 3.3 (1.5-7.2)  | 3.3 (3.1-7.3)  | 5.7 (6.7-6.7)   | 5.7 (3.3-6.7)  |
| %Lymphocytes                       | 1.1 (0.9-1.4)  | 0.7 (0.4-2.2)  | 2.9 (1.7-2.9)   | 1.4 (0.9-2.2)  |
| Haemoglobin                        | 124 (121-145)  | 137 (123-140)  | 164 (142-164)   | 140 (124-145)  |
| Platelets                          | 235 (183-266)  | 144 (108-180)  | 192 (192-202)   | 192 (181-218)  |

|     |                                                                                                                                                                        |           |                     |            |                  |
|-----|------------------------------------------------------------------------------------------------------------------------------------------------------------------------|-----------|---------------------|------------|------------------|
|     | C-reactive protein                                                                                                                                                     | 3.7 (n=1) | 213, 14, 12.6 (n=3) | 4, 4 (n=2) | 8.3 (4-14) (n=6) |
| 139 | BMI=body mass index                                                                                                                                                    |           |                     |            |                  |
| 140 | <sup>1</sup> Haematologic and oncologic conditions (n=12); melanoma on immune checkpoint inhibitors (N=4), ovary, breast, immunoproliferative disease                  |           |                     |            |                  |
| 141 | (HSCT), unspecified lymphoid or haematopoietic tissue malignancy, lymphoma, leukemia (N=2), oesophagus.                                                                |           |                     |            |                  |
| 142 | <sup>2</sup> Immunosuppressive therapy (n=7), solid organ transplant recipients (n=1)                                                                                  |           |                     |            |                  |
| 143 | <sup>3</sup> Primary immunodeficiency (n=3) and HIV (n=4; three had available data on most recent CD4 lymphocyte count; all > 500 cells/mm <sup>3</sup> )              |           |                     |            |                  |
| 144 | <sup>4</sup> Diabetes treatment: lifestyle modifications (n=1) and oral medication (n=2) in the Haematologic/oncologic conditions group; oral medications (n=2) in the |           |                     |            |                  |
| 145 | Secondary Immunosuppression group; and lifestyle modifications + oral medication (n=1) and oral medication + insulin (n=1) in the Primary and Acquired                 |           |                     |            |                  |
| 146 | Immunodeficiency group                                                                                                                                                 |           |                     |            |                  |
| 147 | <sup>5</sup> Cardiovascular disease history: arrhythmia (n=2), pulmonary embolism (n=1) and missing data (n=1) in the Haematologic/oncologic conditions group; and     |           |                     |            |                  |
| 148 | coronary artery disease requiring coronary artery bypass grafting (n=1) in the Secondary Immunosuppression group                                                       |           |                     |            |                  |
| 149 | <sup>6</sup> Respiratory disease history: chronic obstructive pulmonary disease (n=1), productive cough (n=1) and obstructive sleep apnoea (n=1) in the                |           |                     |            |                  |
| 150 | Haematologic/oncologic Conditions group; Obstructive sleep apnoea (n=1) in the Secondary Immunosuppression group; and Asthma (n=5) in the Secondary                    |           |                     |            |                  |
| 151 | Immunosuppression group                                                                                                                                                |           |                     |            |                  |

152 At Days 7 and 28, 47% and 22% of participants, respectively, were still reporting symptoms  
153 (Figure 1). The median (interquartile range [IQR]) time to release from isolation for the total  
154 cohort was 16 (15-27) days: 15 (11-29) days for the haematologic/oncologic group, 26 (17-  
155 27) days for the secondary immunosuppression group, and 14 (14-14) days for the  
156 primary/acquired immunodeficiency group. Nine (33%) of participants were tested for  
157 SARS-CoV-2 by PCR after their entry date test (“Day 0”; see Supplemental Table 2). Of  
158 these nine participants, three (33%) tested positive at Day three, one (11%) at Day seven, two  
159 (22%) at Day 21, one (11%) at Day 28 and two (22%) at three months. Of the two  
160 participants that tested positive at three months, one had melanoma and one had an  
161 autoinflammatory condition.

162

163 **Figure legend.** Proportion of participants reporting symptoms of SARS-CoV-2 infection  
164 over time, by primary immunocompromising diagnostic category. Panel A. Fever; Panel B.  
165 Cough; Panel C. Headache; Panel D. Shortness of breath. E. Any symptom

166

167 Where available, laboratory results were recorded over three months (Supplemental Figure  
168 1). The platelet count peaked at Day 14, while the neutrophil and lymphocyte counts were  
169 highest at baseline and the C-reactive protein was highest at Day three.

170

171 Clinical illness outcomes are shown in Supplemental Table 3. Among the total cohort, nine  
172 (33%; n=3 from each group) required hospitalisation with the median time from enrolment to  
173 hospital admission of three days. Three (11%) participants (two in the secondary  
174 immunosuppression group and one in the hematological/oncological group) required  
175 mechanical ventilation with the median time from enrolment to initiation of mechanical  
176 ventilation of three days. Overall, two (7%) participants died; one was a female in her 60s in

177 the hematological/oncological group and the other was a female in her 80s in the secondary  
178 immunosuppression group. The time from SARS-CoV-2 diagnosis to death for both  
179 participants was 90 days; both died primarily from their underlying disease, rather than  
180 severe COVID-19.

181

## 182 **Discussion**

183 We report demographic and clinical characteristics of individuals with conditions associated  
184 with immune compromise who were diagnosed with COVID-19 from March – October 2020  
185 prior to the introduction of SARS-CoV-2 vaccination, COVID-19 treatments, and the  
186 emergence of VOCs. During this time, there were few data available on the clinical outcomes  
187 of patients with COVID-19, particularly in rare and orphan disease groups, and there was  
188 considerable concern that, similar to other respiratory viruses [8-13], immunosuppressed  
189 individuals may be at risk for increased risk of mortality associated with SARS-CoV-2  
190 infection and slower viral clearance. All patients in our study had symptomatic illness as well  
191 as evidence of prolonged durations of viral shedding.

192

193 The most common clinical presenting symptoms among all participants were cough, and  
194 fever, which were of similar prevalence to that reported in another cohort of 55 patients (9%  
195 were immunocompromised) studied during a similar period in Melbourne, Australia [14]  
196 (cough 64% in our cohort vs. 66%; fever 52% in our cohort versus 47%). Other symptoms  
197 were also similar including sore throat (32% in our cohort vs. 29%) and diarrhoea (24% in  
198 our cohort vs. 29%), although headache was more common among our cohort (40% in our  
199 cohort vs. 0.05%).

200

201 There is documented evidence of prolonged SARS-CoV-2 shedding in immunocompromised  
202 people, which can increase the risk of outgrowth of novel viral variants. The median time to  
203 de-isolation was 16 days in our cohort which is comparable to data published in the general  
204 population during the pre-Delta phase of the pandemic (median 12-16 days [15, 16]. In our  
205 study, the secondary immunosuppression group numerically had the longest median time to  
206 viral clearance (26 days) and there was delayed viral clearance in five patients ranging from  
207 three weeks to three months, in line with similar previous reports in immunocompromised  
208 individuals [17, 18]. A recent case series of SARS-CoV-2 Delta strain infection in  
209 immunocompromised individuals has demonstrated that immunocompromised patients can  
210 shed infectious (culture-positive) virus for up to 33 days accompanied by low levels of  
211 neutralising antibody [17]. These findings have implications for the risk of emergence of new  
212 variants with resistance to SARS-CoV-2 therapeutics, as well as for infection control.  
213 Additionally, for patients requiring allogeneic hematopoietic stem cell transplantation,  
214 chimeric antigen T cell therapies or even chemotherapy, this delayed clearance can delay  
215 therapy and potentially negatively a patient's cancer survival outcomes.

216

217 Our findings suggest that patients in the secondary immunosuppression group may be  
218 functionally more immunocompromised than the haematological/oncology and  
219 primary/acquired immunodeficiency groups. This may reflect the fact that four of the 12  
220 patients in the haematological/oncology group were on immunostimulatory checkpoint  
221 inhibitor therapies, which have been associated with similar mortality rates to patients with  
222 cancer [19]. In addition, three of the seven participants in the primary/acquired  
223 immunodeficiency group were people with HIV on antiretroviral therapy with CD4  
224 lymphocyte counts  $>500$  cells/mm<sup>3</sup>.

225



226 In this cohort of immunocompromised individuals, 33% required hospitalisation, 11%  
227 required mechanical ventilation, and 7% died. At the end of October 2020 in New South  
228 Wales (the end of our study period), among the total 4,237 reported COVID-19 cases, 55  
229 (1.3%) had died [20].

230

### 231 **Conclusions:**

232 Our data provide insights into COVID-19 illness and outcomes in immunocompromised  
233 individuals in a resource-rich setting prior to COVID-19 vaccines and specific therapies, and  
234 at a time when community transmission and healthcare strain was relatively low. These data  
235 provide a benchmark for future work evaluating vulnerable populations including those with  
236 heterogenous conditions affecting immune system function. We acknowledge several  
237 limitations including the small sample size, which reflects the small and short peak of  
238 COVID-19 in New South Wales in 2020, and limited data collection such as serial SARS  
239 CoV-2 PCR results. Further understanding around which specific subgroups of  
240 immunocompromised individuals are at greatest risk of SARS-CoV-2 infection, severe  
241 COVID-19 illness outcomes and prolonged SARS-CoV-2 shedding, particularly in the post-  
242 vaccination era and with the emergence of new variants, remains an important area of  
243 research.

244 **Acknowledgements**

245 #CORIA Study Group: Nila J. Dharan, Sarah C. Sasson, Golo Ahlenstiel, Christopher R.

246 Andersen, Mark Bloch, Griselda Buckland, Nada Hamad, Win Min Han, Anthony D.

247 Kelleher, Georgina V. Long, Gail Matthews, Michael M. Mina, Emmanuella Papot, Kathy

248 Petoumenos, Tri Phan, Sanjay Swaminathan, Barbara Withers, James Yun, Mark N.

249 Polizzotto, David A. Brown, Rowena A. Bull, Matthew S. Carlino, Jennifer Curnow, Sarah

250 Davidson, Dominic E. Dwyer, Prudence N. Gatt, Yuvaraj Ghodke, Sally Hough, Peter

251 MacDonald, Susan Maddocks, Marianne Martinello, Deborah Marriott, Alexander M.

252 Menzies, Tania Sorrell.

253

254 **Supplemental Figure Legend.** Markers of infection and inflammation over time among the

255 total cohort (N=27)

## 256 **References**

- 257 1. Shi H, Han X, Jiang N, Cao Y, Alwalid O, Gu J, et al. Radiological findings from 81  
258 patients with COVID-19 pneumonia in Wuhan, China: a descriptive study. *Lancet Infect Dis.*  
259 2020;20(4):425-34. Epub 2020/02/28. doi: 10.1016/S1473-3099(20)30086-4. PubMed  
260 PMID: 32105637; PubMed Central PMCID: PMC7159053.
- 261 2. Chen N, Zhou M, Dong X, Qu J, Gong F, Han Y, et al. Epidemiological and clinical  
262 characteristics of 99 cases of 2019 novel coronavirus pneumonia in Wuhan, China: a  
263 descriptive study. *Lancet.* 2020;395(10223):507-13. Epub 2020/02/03. doi: 10.1016/s0140-  
264 6736(20)30211-7. PubMed PMID: 32007143.
- 265 3. Huang C, Wang Y, Li X, Ren L, Zhao J, Hu Y, et al. Clinical features of patients  
266 infected with 2019 novel coronavirus in Wuhan, China. *Lancet (London, England).*  
267 2020;395(10223):497-506. Epub 2020/01/28. doi: 10.1016/s0140-6736(20)30183-5. PubMed  
268 PMID: 31986264.
- 269 4. Williamson EJ, Walker AJ, Bhaskaran K, Bacon S, Bates C, Morton CE, et al. Factors  
270 associated with COVID-19-related death using OpenSAFELY. *Nature.* 2020;584(7821):430-  
271 6. doi: 10.1038/s41586-020-2521-4. PubMed PMID: 32640463; PubMed Central PMCID:  
272 PMC7611074.
- 273 5. Shields AM, Anantharachagan A, Arumugakani G, Baker K, Bahal S, Baxendale H,  
274 et al. Outcomes following SARS-CoV-2 infection in patients with primary and secondary  
275 immunodeficiency in the UK. *Clin Exp Immunol.* 2022;209(3):247-58. Epub 2022/06/01.  
276 doi: 10.1093/cei/uxac008. PubMed PMID: 35641155; PubMed Central PMCID:  
277 PMC78807296.
- 278 6. Burrell AJ, Pellegrini B, Salimi F, Begum H, Broadley T, Campbell LT, et al.  
279 Outcomes for patients with COVID-19 admitted to Australian intensive care units during the

- 280 first four months of the pandemic. *Med J Aust.* 2021;214(1):23-30. Epub 2020/12/17. doi:  
281 10.5694/mja2.50883. PubMed PMID: 33325070.
- 282 7. Australian Government Department of Health and Aged Care. Coronavirus (COVID-  
283 19) – CDNA National Guidelines for Public Health Units. Available at:  
284 [https://www.health.gov.au/resources/publications/coronavirus-covid-19-cdna-national-](https://www.health.gov.au/resources/publications/coronavirus-covid-19-cdna-national-guidelines-for-public-health-units)  
285 [guidelines-for-public-health-units](https://www.health.gov.au/resources/publications/coronavirus-covid-19-cdna-national-guidelines-for-public-health-units). Access date July 22, 2023.
- 286 8. Kim YJ, Lee ES, Lee YS. High mortality from viral pneumonia in patients with  
287 cancer. *Infect Dis (Lond).* 2019;51(7):502-9. Epub 2019/05/14. doi:  
288 10.1080/23744235.2019.1592217. PubMed PMID: 31081422.
- 289 9. Manuel O, Estabrook M, American Society of Transplantation Infectious Diseases  
290 Community of P. RNA respiratory viral infections in solid organ transplant recipients:  
291 Guidelines from the American Society of Transplantation Infectious Diseases Community of  
292 Practice. *Clin Transplant.* 2019;33(9):e13511. doi: 10.1111/ctr.13511. PubMed PMID:  
293 30817023.
- 294 10. Gooskens J, Jonges M, Claas EC, Meijer A, Kroes AC. Prolonged influenza virus  
295 infection during lymphocytopenia and frequent detection of drug-resistant viruses. *The*  
296 *Journal of infectious diseases.* 2009;199(10):1435-41. Epub 2009/04/28. doi:  
297 10.1086/598684. PubMed PMID: 19392620.
- 298 11. Hill-Cawthorne GA, Schelenz S, Lawes M, Dervisevic S. Oseltamivir-resistant  
299 pandemic (H1N1) 2009 in patient with impaired immune system. *Emerging infectious*  
300 *diseases.* 2010;16(7):1185-6. Epub 2010/07/01. doi: 10.3201/eid1607.091579. PubMed  
301 PMID: 20587208; PubMed Central PMCID: PMCPMC3321897.
- 302 12. Shalhoub S, AlZahrani A, Simhairi R, Mushtaq A. Successful recovery of MERS  
303 CoV pneumonia in a patient with acquired immunodeficiency syndrome: a case report.  
304 *Journal of clinical virology : the official publication of the Pan American Society for Clinical*

- 305 Virology. 2015;62:69-71. Epub 2014/12/30. doi: 10.1016/j.jcv.2014.11.030. PubMed PMID:  
306 25542475.
- 307 13. Weinstock DM, Gubareva LV, Zuccotti G. Prolonged shedding of multidrug-resistant  
308 influenza A virus in an immunocompromised patient. N Engl J Med. 2003;348(9):867-8.  
309 Epub 2003/02/28. doi: 10.1056/nejm200302273480923. PubMed PMID: 12606750.
- 310 14. Copaesu A, James F, Mouhtouris E, Vogrin S, Smibert OC, Gordon CL, et al. The  
311 Role of Immunological and Clinical Biomarkers to Predict Clinical COVID-19 Severity and  
312 Response to Therapy-A Prospective Longitudinal Study. Front Immunol. 2021;12:646095.  
313 doi: 10.3389/fimmu.2021.646095. PubMed PMID: 33815405; PubMed Central PMCID:  
314 PMCPMC8009986.
- 315 15. Mallett S, Allen AJ, Graziadio S, Taylor SA, Sakai NS, Green K, et al. At what times  
316 during infection is SARS-CoV-2 detectable and no longer detectable using RT-PCR-based  
317 tests? A systematic review of individual participant data. BMC Med. 2020;18(1):346. doi:  
318 10.1186/s12916-020-01810-8. PubMed PMID: 33143712; PubMed Central PMCID:  
319 PMCPMC7609379.
- 320 16. Cevik M, Tate M, Lloyd O, Maraolo AE, Schafers J, Ho A. SARS-CoV-2, SARS-  
321 CoV, and MERS-CoV viral load dynamics, duration of viral shedding, and infectiousness: a  
322 systematic review and meta-analysis. Lancet Microbe. 2021;2(1):e13-e22. doi:  
323 10.1016/S2666-5247(20)30172-5. PubMed PMID: 33521734; PubMed Central PMCID:  
324 PMCPMC7837230.
- 325 17. Kim KW, Wang X, Adhikari A, Yeang M, Jenkins F, Naing Z, et al. Persistent high-  
326 level shedding of cultivable SARS-CoV-2 Delta virus 33 days after onset of COVID-19 in a  
327 hospitalized patient with pneumonia. J Med Virol. 2022;94(9):4043-6. doi:  
328 10.1002/jmv.27832. PubMed PMID: 35509147.

- 329 18. Zhu L, Gong N, Liu B, Lu X, Chen D, Chen S, et al. Coronavirus Disease 2019  
330 Pneumonia in Immunosuppressed Renal Transplant Recipients: A Summary of 10 Confirmed  
331 Cases in Wuhan, China. *Eur Urol.* 2020;77(6):748-54. doi: 10.1016/j.eururo.2020.03.039.  
332 PubMed PMID: 32317180; PubMed Central PMCID: PMC7166037.
- 333 19. Rogiers A, Pires da Silva I, Tentori C, Tondini CA, Grimes JM, Trager MH, et al.  
334 Clinical impact of COVID-19 on patients with cancer treated with immune checkpoint  
335 inhibition. *J Immunother Cancer.* 2021;9(1). Epub 2021/01/21. doi: 10.1136/jitc-2020-  
336 001931. PubMed PMID: 33468556; PubMed Central PMCID: PMC7817383.
- 337 20. New South Wales Government. COVID-19 weekly surveillance in NSW  
338 epidemiological week 44, ending 31 October 2020. Available at:  
339 [https://www.health.nsw.gov.au/Infectious/covid-19/Documents/covid-19-surveillance-report-](https://www.health.nsw.gov.au/Infectious/covid-19/Documents/covid-19-surveillance-report-20211111.pdf)  
340 [20211111.pdf](https://www.health.nsw.gov.au/Infectious/covid-19/Documents/covid-19-surveillance-report-20211111.pdf). Access date July 22, 2023.
- 341

## **Disclaimer**

This publication was funded by the Australian Government Department of Health. The views expressed in this publication do not necessarily represent the position of the Australian Government.

Fever

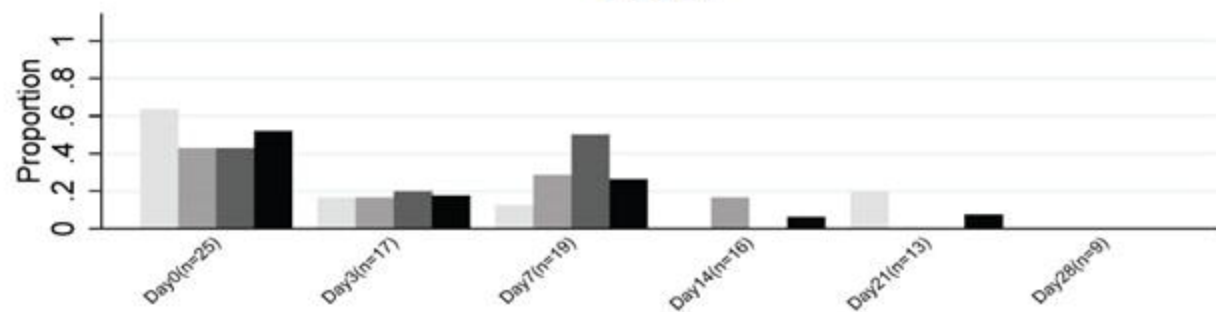

Cough

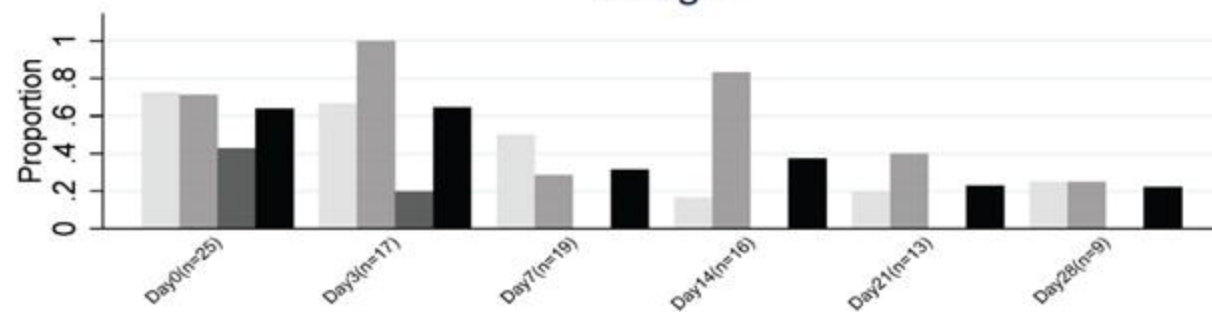

Headache

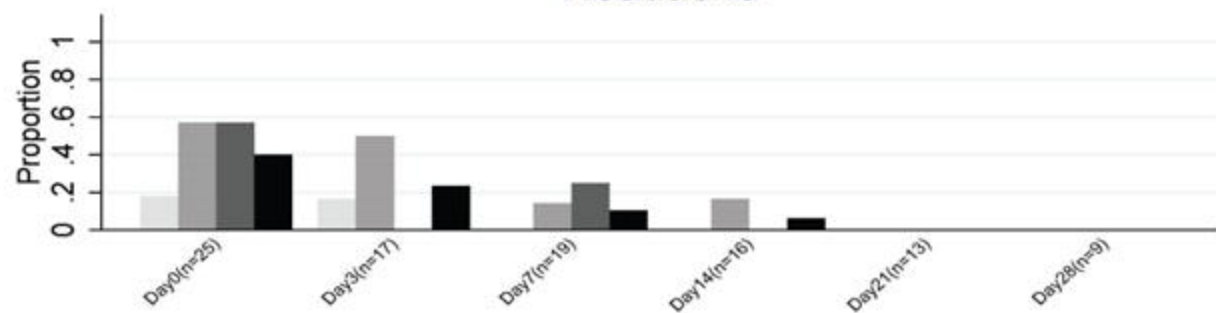

Shortness of breath

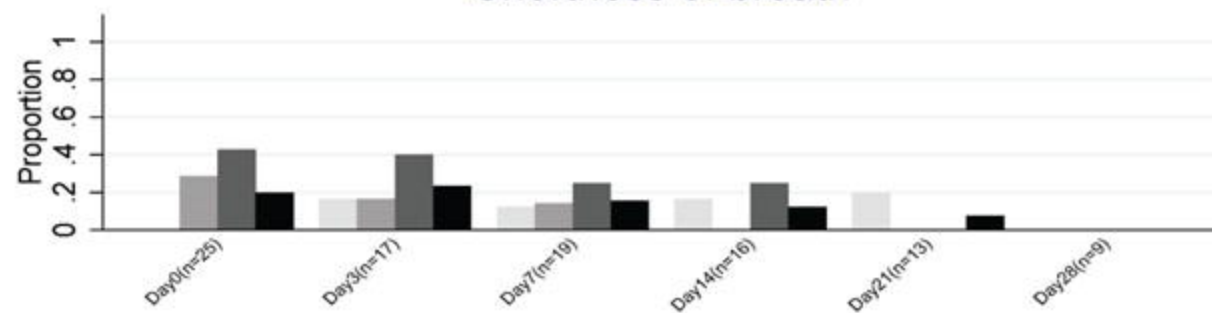

Any symptom

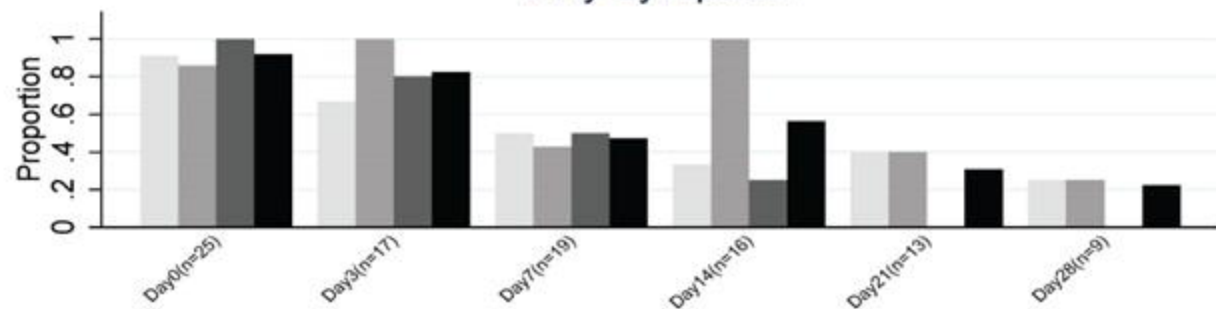

Haematologic/oncologic conditions  
Primary/Acquired Immunodeficiency

Secondary Immunosuppression  
Total



**Supplemental Table 1. Medication list** (data available for 19 participants)

| <b>Participant</b> | <b>Primary diagnostic criteria</b> | <b>Underlying immunosuppressive condition</b>          | <b>Medications</b>                           |
|--------------------|------------------------------------|--------------------------------------------------------|----------------------------------------------|
| 1                  | Haematologic/oncologic conditions  | Cutaneous melanoma                                     | Anti-PD-1, Anti-PDL1                         |
| 2                  | Haematologic/oncologic conditions  | Cutaneous melanoma                                     | Anti-PD-1, Anti-CTLA-4                       |
| 3                  | Haematologic/oncologic conditions  | Cutaneous melanoma                                     | Anti-PD-1, Anti-CTLA-4                       |
| 4                  | Haematologic/oncologic conditions  | Follicular lymphoma                                    | Rituximab, Intravenous immunoglobulin (IvIg) |
| 5                  | Haematologic/oncologic conditions  | Refractory myeloma                                     | Methylprednisolone                           |
| 6                  | Haematologic/oncologic conditions  | Malignant neoplasm of other connective and soft tissue | Anti-PD-1                                    |
| 7                  | Haematologic/oncologic conditions  | Malignant immunoproliferative diseases                 | Ruxolitinib                                  |

|    |                                   |                                             |                                                             |
|----|-----------------------------------|---------------------------------------------|-------------------------------------------------------------|
| 8  | Haematologic/oncologic conditions | Chronic transfusion dependent myelofibrosis | Ruxolitinib                                                 |
| 9  | Haematologic/oncologic conditions | Malignant neoplasm of oesophagus            | Trastuzumab (Herceptin), Capecitabine                       |
| 10 | Primary/acquired immunodeficiency | HIV infection                               | Elvitegravir/cobicistat/emtricitabine/tenofovir alafenamide |
| 11 | Primary/acquired immunodeficiency | HIV infection                               | Dolutegravir+darunivir/cobicistat                           |
| 12 | Primary/acquired immunodeficiency | HIV infection                               | Dolutegravir+darunivir/cobicistat                           |
| 13 | Primary/acquired immunodeficiency | HIV infection                               | Not on HIV treatment                                        |
| 14 | Primary/acquired immunodeficiency | Unknown                                     | Mycophenolate Mofetil, Prednisone                           |
| 15 | Primary/acquired immunodeficiency | Autoinflammatory Disorders                  | Methotrexate                                                |
| 16 | Primary/acquired immunodeficiency | Autoinflammatory Disorders                  | Etanercept, Prednisone                                      |
| 17 | Secondary immunosuppression       | Psoriasis                                   | Secukinumab                                                 |

|    |                             |                                     |                             |
|----|-----------------------------|-------------------------------------|-----------------------------|
| 18 | Secondary immunosuppression | Multiple sclerosis                  | Fingolimod                  |
| 19 | Secondary immunosuppression | Rheumatoid arthritis                | Methotrexate, Sulfasalazine |
| 20 | Secondary immunosuppression | MOG Antibody Demyelinating Syndrome | Tecifidera, Ocrelizumab     |

**Supplemental Table 2.** Number of participants with positive COVID-19 PCR positive results over time, by primary immunocompromising diagnostic category\*

|                                                       | Primary diagnostic category                 |                                                                     |                                             | Total<br>N=9 |
|-------------------------------------------------------|---------------------------------------------|---------------------------------------------------------------------|---------------------------------------------|--------------|
|                                                       | Haematologic/oncologic<br>conditions<br>N=5 | Secondary<br>Immunosuppressive/immunomodulatory<br>treatment<br>N=3 | Primary/Acquired<br>Immunodeficiency<br>N=1 |              |
| <b>Last time point<br/>with positive<br/>PCR test</b> |                                             |                                                                     |                                             |              |
| Day 3                                                 | 1                                           | 2                                                                   | -                                           | 3            |
| Day 7                                                 | 1                                           | -                                                                   | -                                           | 1            |
| Day 14                                                | -                                           | -                                                                   | -                                           | -            |
| Day 21                                                | 1                                           | 1                                                                   | -                                           | 2            |
| Day 28                                                | 1                                           | -                                                                   | -                                           | 1            |
| Month 3                                               | 1                                           | -                                                                   | 1                                           | 2            |

\*Only positive PCR results are reported.

**Supplemental Table 3.** Clinical outcomes of participants at three months after enrolment.

|                                               | Hospitalisation  |                                                        | Invasive mechanical ventilation |                                                        | Death            |                                                        |
|-----------------------------------------------|------------------|--------------------------------------------------------|---------------------------------|--------------------------------------------------------|------------------|--------------------------------------------------------|
|                                               | Month 3<br>n (%) | Time from enrollment to<br>outcome (median, IQR), days | Month 3<br>n (%)                | Time from enrollment to<br>outcome (median, IQR), days | Month 3<br>n (%) | Time from enrollment to<br>outcome (median, IQR), days |
| <b>Haematologic/oncologic<br/>conditions</b>  | 3 (25%)          | 3 (1-7)                                                | 1 (8%)                          | 14                                                     | 1 (8%)           | 90                                                     |
| <b>Secondary<br/>Immunosuppression</b>        | 3 (38%)          | 7 (1-28)                                               | 2 (25%)                         | 3 (3-3)                                                | 1 (13%)          | 90                                                     |
| <b>Primary/acquired<br/>immunosuppression</b> | 3 (43%)          | 3 (3-3)                                                | 0 (0%)                          | NA                                                     | 0 (0%)           | NA                                                     |
| Total                                         | 9 (33%)          | 3 (1-5)                                                | 3 (11%)                         | 3 (3-14)                                               | 2 (4%)           | 90 (90-90)                                             |

### Platelets

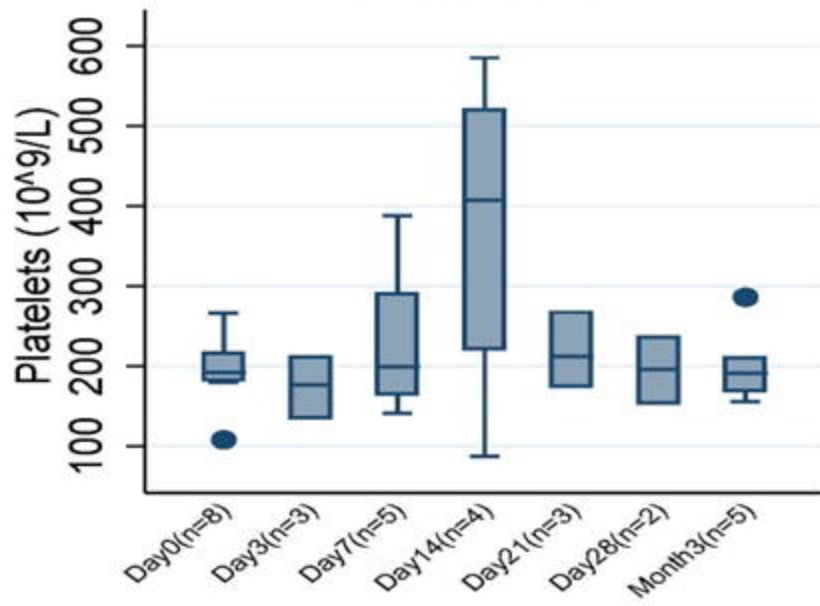

### Neutrophils

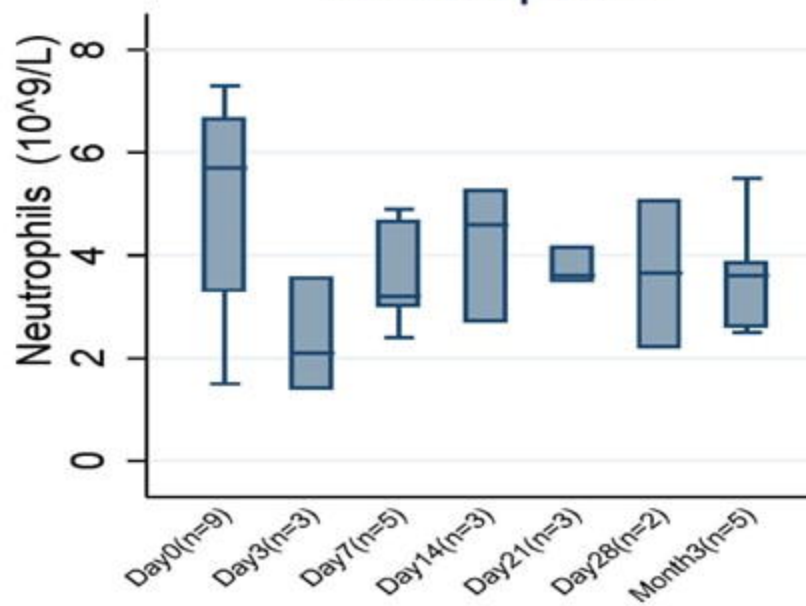

### Lymphocytes

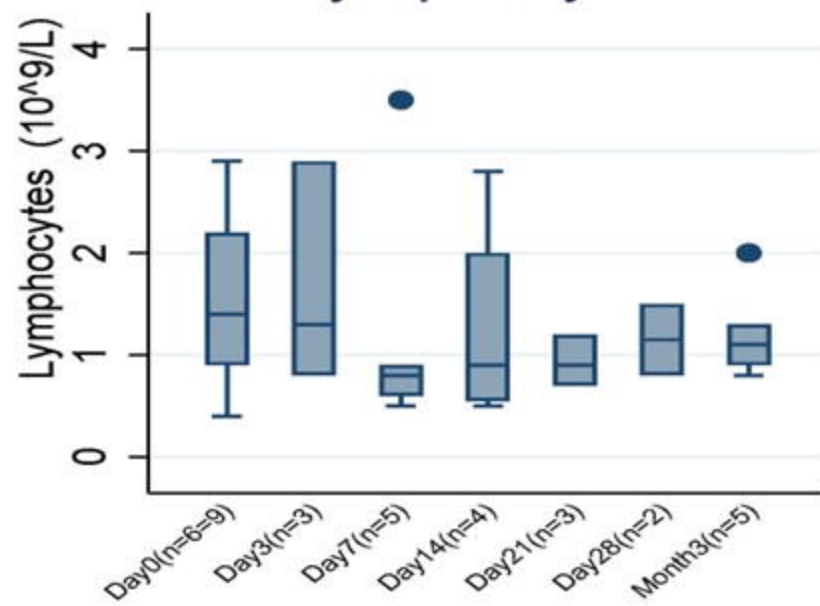

### CRP

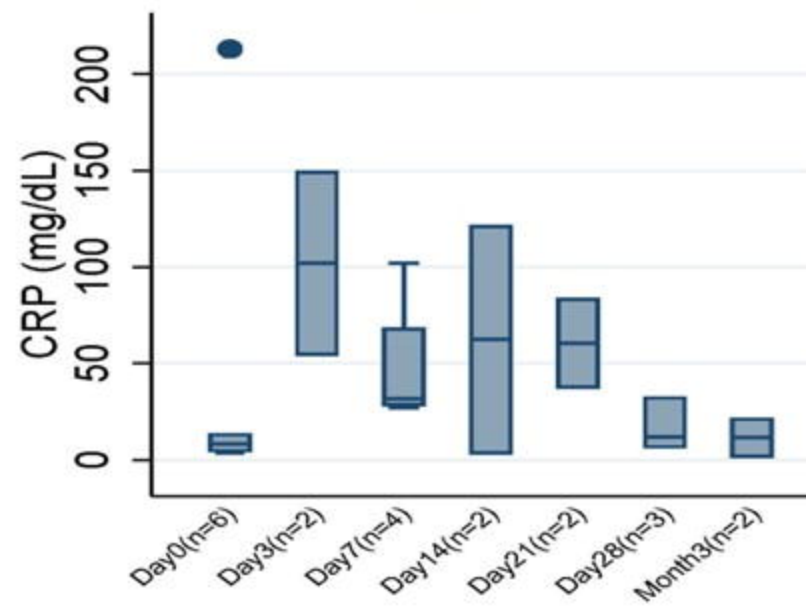

Source: http://medrxiv.org/content/10.1101/2023.08.17.23293358v1.full.pdf
